# Supplementary material
Source: HighWire-hosted journal article supplement (http://www.ajnr.org/highwire/filestream/55349/field_highwire_adjunct_files/0/17-00378.pdf)
Supplement: 17-00378.pdf [file 17-00378.pdf]

**On-line Table 1: Associations between carotid characteristics and cortical infarcts in subjects with small time interval between brain MRI and carotid MRI<sup>a</sup>**

|                                             | Per Participant (n = 331) |         |                      |         | Per Carotid Artery (n = 615) |         |                      |         |
|---------------------------------------------|---------------------------|---------|----------------------|---------|------------------------------|---------|----------------------|---------|
|                                             | Model A <sup>b</sup>      | P Value | Model B <sup>c</sup> | P Value | Model A <sup>b</sup>         | P Value | Model B <sup>c</sup> | P Value |
| Plaque components                           |                           |         |                      |         |                              |         |                      |         |
| Intraplaque hemorrhage                      | 2.1 (0.9–3.5)             | .108    | 2.1 (0.9–5.2)        | .101    | 2.8 (1.0–7.5)                | .049    | 1.9 (1.0–7.9)        | .046    |
| Lipid core                                  | 1.0 (0.4–2.3)             | .964    | 1.0 (0.4–2.4)        | .978    | 1.2 (0.5–3.2)                | .653    | 1.2 (0.5–3.2)        | .657    |
| Calcification                               | 1.1 (0.2–5.1)             | .892    | 1.1 (0.3–5.3)        | .861    | 2.7 (0.6–12.8)               | .199    | 2.7 (0.6–12.6)       | .193    |
| Measures of plaque size                     |                           |         |                      |         |                              |         |                      |         |
| Maximum carotid wall thickness <sup>d</sup> | 1.6 (1.1–2.3)             | .008    | 1.6 (1.1–2.4)        | .007    | 1.9 (1.3–2.7)                | <.001   | 2.1 (1.4–3.1)        | <.001   |
| ≥30% stenosis <sup>e</sup>                  | 1.2 (0.5–3.1)             | .690    | 1.3 (0.5–3.5)        | .579    | 2.6 (0.9–7.2)                | .072    | 2.9 (1.0;8.7)        | .049    |

<sup>a</sup> Values represent odds ratios (95% confidence intervals).

<sup>b</sup> Model A is adjusted for age, sex, and time interval between brain MRI and carotid MRI.

<sup>c</sup> Model B is adjusted for age, sex, time interval between brain MRI and carotid MRI, and major cardiovascular risk factors (hypertension, smoking, diabetes mellitus, and hypercholesterolemia).

<sup>d</sup> Odds ratio per millimeter increase.

<sup>e</sup> Odds ratio of carotid stenosis of ≥30%.

**On-line Table 2: Associations between carotid plaque characteristics and WML load in subjects with a short time interval between brain MRI and carotid MRI (n = 305)<sup>a</sup>**

|                                             | Model A <sup>b</sup> | P Value | Model B <sup>c</sup> | P Value |
|---------------------------------------------|----------------------|---------|----------------------|---------|
| Plaque components                           |                      |         |                      |         |
| Intraplaque hemorrhage                      | 0.27 (0.08–0.54)     | .044    | 0.28 (0.02–0.54)     | .037    |
| Lipid core                                  | −0.19 (−0.45–0.08)   | .160    | −0.16 (−0.42–0.10)   | .221    |
| Calcification                               | 0.30 (−0.12–0.72)    | .165    | 0.29 (−1.12–0.71)    | .161    |
| Measures of plaque size                     |                      |         |                      |         |
| Maximum carotid wall thickness <sup>d</sup> | 0.07 (−0.07–0.20)    | .331    | 0.06 (−0.08–0.19)    | .382    |
| ≥30% stenosis                               | −0.19 (−0.50–0.12)   | .224    | −0.23 (−0.53–0.08)   | .149    |

<sup>a</sup> Values represent increase in WML load (natural log-transformed) (95% confidence intervals) for the presence of plaque components, the presence of carotid stenosis of ≥30%, or per millimeter increase in maximum wall thickness.

<sup>b</sup> Model A is adjusted for age, sex, and time interval between brain MRI and carotid MRI.

<sup>c</sup> Model B is adjusted for age, sex, time interval between brain MRI and carotid MRI, and major cardiovascular risk factors (hypertension, smoking, diabetes mellitus, and hypercholesterolemia).

<sup>d</sup> Regression coefficients per mm increase.
